# Supplementary material
Source: HighWire-hosted journal article supplement (https://jech.bmj.com/content/75/11/1050)
Supplement: inline-supplementary-material-1 [file inline-supplementary-material-1.pdf]

**SUPPLEMENTARY MATERIAL**

Supplementary table 1: Baseline characteristics of UK Biobank participants by fifths of Townsend score and sex

| Characteristic                 | Women                                     |                 |                 |                 |                                          | Men                                       |                 |                 |                 |                                          |
|--------------------------------|-------------------------------------------|-----------------|-----------------|-----------------|------------------------------------------|-------------------------------------------|-----------------|-----------------|-----------------|------------------------------------------|
|                                | 1 <sup>st</sup><br>Least<br>disadvantaged | 2 <sup>nd</sup> | 3 <sup>rd</sup> | 4 <sup>th</sup> | 5 <sup>th</sup><br>Most<br>disadvantaged | 1 <sup>st</sup><br>Least<br>disadvantaged | 2 <sup>nd</sup> | 3 <sup>rd</sup> | 4 <sup>th</sup> | 5 <sup>th</sup><br>Most<br>disadvantaged |
| n                              | 100996                                    | 56590           | 41246           | 36909           | 37307                                    | 84877                                     | 46179           | 33335           | 30456           | 33970                                    |
| Age (years)                    | 57.0 (7.8)                                | 56.7 (7.9)      | 56.1 (8.1)      | 55.7 (8.2)      | 55.1 (8.3)                               | 57.5 (7.9)                                | 57.2 (8.1)      | 56.4 (8.3)      | 55.9 (8.4)      | 55.3 (8.4)                               |
| Ethnicity n (%)                |                                           |                 |                 |                 |                                          |                                           |                 |                 |                 |                                          |
| White                          | 98545 (97.6)                              | 54610 (96.5)    | 38859 (94.2)    | 33491 (90.7)    | 31624 (84.8)                             | 82739 (97.5)                              | 44556 (96.5)    | 31288 (93.9)    | 27597 (90.6)    | 28808 (84.8)                             |
| Other                          | 2209 (2.2)                                | 1767 (3.1)      | 2249 (5.5)      | 3205 (8.7)      | 5332 (14.3)                              | 1784 (2.1)                                | 1420 (3.1)      | 1858 (5.6)      | 2634 (8.6)      | 4734 (13.9)                              |
| Systolic Blood pressure (mmHg) | 136 (19.3)                                | 135.8 (19.2)    | 134.9 (19.1)    | 134.5 (19.2)    | 133.9 (19.2)                             | 141.5 (17.2)                              | 141.5 (17.4)    | 140.8 (17.4)    | 140.2 (17.6)    | 139.5 (18.0)                             |
| Diabetes n (%)                 |                                           |                 |                 |                 |                                          |                                           |                 |                 |                 |                                          |
| No Diabetes                    | 97978 (97.0)                              | 54495 (96.3)    | 39520 (95.8)    | 34908 (94.6)    | 34504 (92.5)                             | 79886 (94.1)                              | 43116 (93.4)    | 30847 (92.5)    | 27658 (90.8)    | 29813 (87.8)                             |
| Type 1                         | 163 (0.2)                                 | 115 (0.2)       | 89 (0.2)        | 92 (0.2)        | 105 (0.3)                                | 206 (0.2)                                 | 116 (0.3)       | 81 (0.2)        | 116 (0.4)       | 134 (0.4)                                |
| Type 2                         | 2615 (2.6)                                | 1804 (3.2)      | 1487 (3.6)      | 1698 (4.6)      | 2332 (6.3)                               | 4543 (5.4)                                | 2790 (6.0)      | 2234 (6.7)      | 2441 (8.0)      | 3498 (10.3)                              |
| Smoking n (%)                  |                                           |                 |                 |                 |                                          |                                           |                 |                 |                 |                                          |
| Never                          | 65193 (64.6)                              | 34506 (61.0)    | 23955 (58.1)    | 20036 (54.3)    | 18168 (48.7)                             | 44960 (53.0)                              | 23288 (50.4)    | 16078 (48.2)    | 13743 (45.1)    | 13238 (39.0)                             |
| Former                         | 29983 (29.7)                              | 17787 (31.4)    | 13361 (32.4)    | 12159 (32.9)    | 12059 (32.3)                             | 32868 (38.7)                              | 18041 (39.1)    | 12948 (38.8)    | 11500 (37.8)    | 12151 (35.8)                             |
| Current                        | 5436 (5.4)                                | 4039 (7.1)      | 3727 (9.0)      | 4463 (12.1)     | 6666 (17.9)                              | 6725 (7.9)                                | 4616 (10.0)     | 4109 (12.3)     | 4991 (16.4)     | 8128 (23.9)                              |
| BMI (kg/m <sup>2</sup> )       | 26.6 (4.7)                                | 26.9 (5.0)      | 27.1 (5.2)      | 27.6 (5.6)      | 28.3 (6.1)                               | 27.6 (3.9)                                | 27.8 (4.1)      | 27.9 (4.3)      | 28.0 (4.6)      | 28.2 (4.9)                               |
| Total cholesterol (mmol/L)     | 5.9 (1.1)                                 | 5.9 (1.1)       | 5.9 (1.1)       | 5.8 (1.1)       | 5.7 (1.1)                                | 5.5 (1.1)                                 | 5.5 (1.1)       | 5.5 (1.1)       | 5.4 (1.1)       | 5.4 (1.2)                                |
| Previous CVD n (%)             | 2844 (2.8)                                | 1863 (3.3)      | 1422 (3.4)      | 1619 (4.4)      | 2345 (6.3)                               | 6482 (7.6)                                | 3887 (8.4)      | 2899 (8.7)      | 2975 (9.8)      | 4191 (12.3)                              |

**Supplementary table 2: Age and ethnicity adjusted rates (per 100,000 person years) with 95% confidence intervals of influenza or pneumonia, and CVD from entry to the UK Biobank to 30 November 2020, by sex**

| Fifth | Women   |                        |                         |        | Men                       |         |                        |                           |        |                              |
|-------|---------|------------------------|-------------------------|--------|---------------------------|---------|------------------------|---------------------------|--------|------------------------------|
|       | n       | Influenza or pneumonia |                         | CVD    |                           | n       | Influenza or pneumonia |                           | CVD    |                              |
|       |         | Deaths                 | Rate                    | Deaths | Rate                      |         | Deaths                 | Rate                      | Deaths | Rate                         |
| 1     | 100,996 | 50                     | 4.29<br>(2.56 to 6.03)  | 363    | 31.16<br>(26.58 to 35.74) | 84,877  | 99                     | 10.32<br>(7.43 to 13.21)  | 937    | 96.99<br>(87.81 to 106.17)   |
| 2     | 56,590  | 41                     | 6.15<br>(3.60 to 8.70)  | 227    | 34.82<br>(28.08 to 41.56) | 46,179  | 65                     | 12.56<br>(7.96 to 17.16)  | 642    | 123.32<br>(109.06 to 137.59) |
| 3     | 41,246  | 34                     | 7.22<br>(3.50 to 10.94) | 182    | 38.43<br>(30.08 to 46.79) | 33,335  | 39                     | 10.54<br>(5.68 to 15.40)  | 514    | 136.59<br>(118.61 to 154.87) |
| 4     | 36,909  | 40                     | 9.61<br>(5.65 to 13.56) | 224    | 53.28<br>(42.65 to 63.92) | 30,456  | 61                     | 18.20<br>(11.01 to 25.39) | 564    | 166.32<br>(145.05 to 187.60) |
| 5     | 37,307  | 40                     | 9.23<br>(4.61 to 13.85) | 255    | 60.40<br>(48.76 to 72.04) | 33,970  | 108                    | 28.66<br>(20.36 to 36.97) | 827    | 220.94<br>(197.45 to 244.00) |
| Total | 273,048 | 205                    | 6.49<br>(5.16 to 7.83)  | 1251   | 39.90<br>(36.57 to 43.23) | 228,817 | 372                    | 14.45<br>(12.23 to 16.66) | 3484   | 134.80<br>(127.99 to 141.62) |

**Supplementary table 3: Baseline characteristics of 472, 946 UK Biobank participants alive on 1<sup>st</sup> February 2020, by sex**

| <b>Characteristic</b>                           | <b>Women</b><br>(n=261,378) | <b>Men</b><br>(n=211,568) |
|-------------------------------------------------|-----------------------------|---------------------------|
| Age <sup>a</sup> (years), mean (sd)             | 67.7 (8.0)                  | 67.9 (8.2)                |
| White ethnicity, n (%)                          | 246,113 (94.1)              | 198,665 (93.8)            |
| Townsend deprivation score                      |                             |                           |
| Fifths, n (%)                                   |                             |                           |
| 1 <sup>st</sup> <i>Least disadvantaged</i>      | 97,172 (37.2)               | 79,552 (37.6)             |
| 2 <sup>nd</sup>                                 | 54,301 (20.8)               | 42,969 (20.3)             |
| 3 <sup>rd</sup>                                 | 39,513 (15.1)               | 30,907 (14.6)             |
| 4 <sup>th</sup>                                 | 35,232 (13.5)               | 27,910 (13.2)             |
| 5 <sup>th</sup> <i>Most disadvantaged</i>       | 35,160 (13.5)               | 30,230 (14.3)             |
| <i>Continuous (per unit)</i>                    | -1.35 (3.03)                | -1.30 (3.12)              |
| Systolic blood pressure (mmHg), mean (sd)       | 135.1 (19.1)                | 140.7 (17.3)              |
| Diabetes, n (%)                                 |                             |                           |
| <i>No Diabetes</i>                              | 250,879 (96.0)              | 196,925 (93.1)            |
| <i>Type 1</i>                                   | 485 (0.2)                   | 542 (0.3)                 |
| <i>Type 2</i>                                   | 8928 (3.4)                  | 12,894 (6.1)              |
| Smoking, n (%)                                  |                             |                           |
| <i>Never</i>                                    | 156,458 (59.9)              | 105,844 (50.0)            |
| <i>Former</i>                                   | 81,191 (31.1)               | 79,585 (37.6)             |
| <i>Current</i>                                  | 22,332 (8.5)                | 24,857 (11.8)             |
| Body mass index (kg/m <sup>2</sup> ), mean (sd) | 27.1 (5.2)                  | 27.8 (4.2)                |
| Total cholesterol (mmol/L), mean (sd)           | 5.9 (1.1)                   | 5.5 (1.1)                 |
| Previous CVD, n (%)                             | 8900 (3.4)                  | 16,770 (7.9)              |

<sup>a</sup> Age of participants at 1<sup>st</sup> February 2020

**Supplementary table 4: Age and ethnicity adjusted, and multiple adjusted<sup>1</sup> hazard ratios (HRs, with 95% confidence intervals(CIs)), and women to men ratio of hazard ratios (RHRs, with 95% CIs) for the association between fifths of Townsend score and death from COVID-19, influenza or pneumonia, and cardiovascular disease (CVD) by sex.**

| Townsend score                      | Age and ethnicity adjusted |                     |                     | Multiple adjusted <sup>1</sup> |                     |                     |
|-------------------------------------|----------------------------|---------------------|---------------------|--------------------------------|---------------------|---------------------|
|                                     | Women HR (95%CI)           | Men HR (95%CI)      | RHR (95% CI)        | Women HR (95%CI)               | Men HR (95%CI)      | RHR (95% CI)        |
| <b>COVID-19</b>                     |                            |                     |                     |                                |                     |                     |
| 1 <sup>st</sup> Least disadvantaged | Ref                        | Ref                 | Ref                 | Ref                            | Ref                 | Ref                 |
| 2 <sup>nd</sup>                     | 1.34 (0.96 to 1.87)        | 1.32 (1.06 to 1.66) | 1.01 (0.68 to 1.51) | 1.37 (0.99 to 1.92)            | 1.31 (1.03 to 1.66) | 1.05 (0.70 to 1.58) |
| 3 <sup>rd</sup>                     | 1.55 (1.07 to 2.24)        | 1.45 (1.12 to 1.89) | 1.07 (0.68 to 1.68) | 1.33 (0.90 to 1.96)            | 1.46 (1.11 to 1.91) | 0.91 (0.57 to 1.47) |
| 4 <sup>th</sup>                     | 2.98 (2.23 to 3.98)        | 2.10 (1.65 to 2.67) | 1.42 (0.97 to 2.07) | 2.21 (1.62 to 3.00)            | 2.00 (1.56 to 2.56) | 1.11 (0.74 to 1.64) |
| 5 <sup>th</sup> Most disadvantaged  | 3.66 (2.82 to 4.75)        | 3.00 (2.46 to 3.66) | 1.22 (0.88 to 1.69) | 2.20 (1.63 to 2.96)            | 2.62 (2.12 to 3.24) | 0.84 (0.58 to 1.21) |
| <b>Influenza or pneumonia</b>       |                            |                     |                     |                                |                     |                     |
| 1 <sup>st</sup> Least disadvantaged | Ref                        | Ref                 | Ref                 | Ref                            | Ref                 | Ref                 |
| 2 <sup>nd</sup>                     | 1.46 (1.07 to 1.99)        | 1.25 (0.98 to 1.59) | 1.17 (0.79 to 1.74) | 1.27 (0.92 to 1.76)            | 1.20 (0.93 to 1.55) | 1.06 (0.70 to 1.60) |
| 3 <sup>rd</sup>                     | 1.82 (1.30 to 2.55)        | 1.13 (0.83 to 1.55) | 1.61 (1.02 to 2.55) | 1.52 (1.07 to 2.16)            | 1.02 (0.73 to 1.42) | 1.49 (0.92 to 2.41) |
| 4 <sup>th</sup>                     | 2.52 (1.85 to 3.44)        | 2.06 (1.60 to 2.64) | 1.23 (0.82 to 1.83) | 1.98 (1.44 to 2.72)            | 1.71 (1.31 to 2.24) | 1.16 (0.76 to 1.75) |
| 5 <sup>th</sup> Most disadvantaged  | 2.60 (1.90 to 3.57)        | 3.47 (2.86 to 4.21) | 0.75 (0.52 to 1.09) | 1.56 (1.09 to 2.21)            | 2.56 (2.06 to 3.18) | 0.61 (0.40 to 0.92) |
| <b>CVD</b>                          |                            |                     |                     |                                |                     |                     |
| 1 <sup>st</sup> Least disadvantaged | Ref                        | Ref                 | Ref                 | Ref                            | Ref                 | Ref                 |
| 2 <sup>nd</sup>                     | 1.14 (1.00 to 1.30)        | 1.30 (1.20 to 1.41) | 0.87 (0.75 to 1.02) | 1.01 (0.88 to 1.16)            | 1.20 (1.11 to 1.31) | 0.84 (0.71 to 0.98) |
| 3 <sup>rd</sup>                     | 1.33 (1.15 to 1.54)        | 1.54 (1.41 to 1.68) | 0.86 (0.73 to 1.02) | 1.22 (1.05 to 1.42)            | 1.35 (1.23 to 1.48) | 0.90 (0.76 to 1.07) |
| 4 <sup>th</sup>                     | 1.92 (1.68 to 2.19)        | 1.96 (1.80 to 2.12) | 0.98 (0.84 to 1.15) | 1.48 (1.29 to 1.70)            | 1.57 (1.43 to 1.71) | 0.94 (0.80 to 1.11) |
| 5 <sup>th</sup> Most disadvantaged  | 2.30 (2.03 to 2.60)        | 2.75 (2.56 to 2.95) | 0.84 (0.72 to 0.96) | 1.43 (1.24 to 1.64)            | 1.83 (1.69 to 1.97) | 0.78 (0.67 to 0.92) |

<sup>1</sup> Adjusted for age, ethnicity, systolic blood pressure, diabetes, smoking, BMI, total cholesterol, and previous CVD.

**Supplementary table 5: Age and ethnicity adjusted hazard ratios (HRs, with 95% confidence intervals (CIs)) by sex, and women to men ratio of hazard ratios (RHRs, with 95% CIs) for the association between one unit higher Townsend score and death from COVID-19, influenza or pneumonia, and cardiovascular disease (CVD) by sex, using data left censored at 1<sup>st</sup> February 2020.**

| <b>Outcome</b>                | <b>Women HR (95% CI)</b> | <b>Men HR (95% CI)</b> | <b>RHR (95% CI)</b> |
|-------------------------------|--------------------------|------------------------|---------------------|
| <b>COVID-19</b>               | 1.15 (1.11 to 1.20)      | 1.13 (1.10 to 1.16)    | 1.02 (0.97 to 1.07) |
| <b>Influenza or pneumonia</b> | 1.16 (1.00 to 1.35)      | 1.10 (1.01 to 1.20)    | 1.05 (0.88 to 1.26) |
| <b>CVD</b>                    | 1.06 (1.01 to 1.11)      | 1.09 (1.06 to 1.12)    | 0.97 (0.92 to 1.03) |

Note that the COVID-19 results must be the same as when the entire UK Biobank follow-up is analysed

**Supplementary figure 1: Penalised spline plots of multiple adjusted<sup>1</sup> hazard ratios (with shaded 95% confidence intervals) for the association between Townsend score and death from COVID-19, influenza or pneumonia, and cardiovascular disease (CVD), by sex**

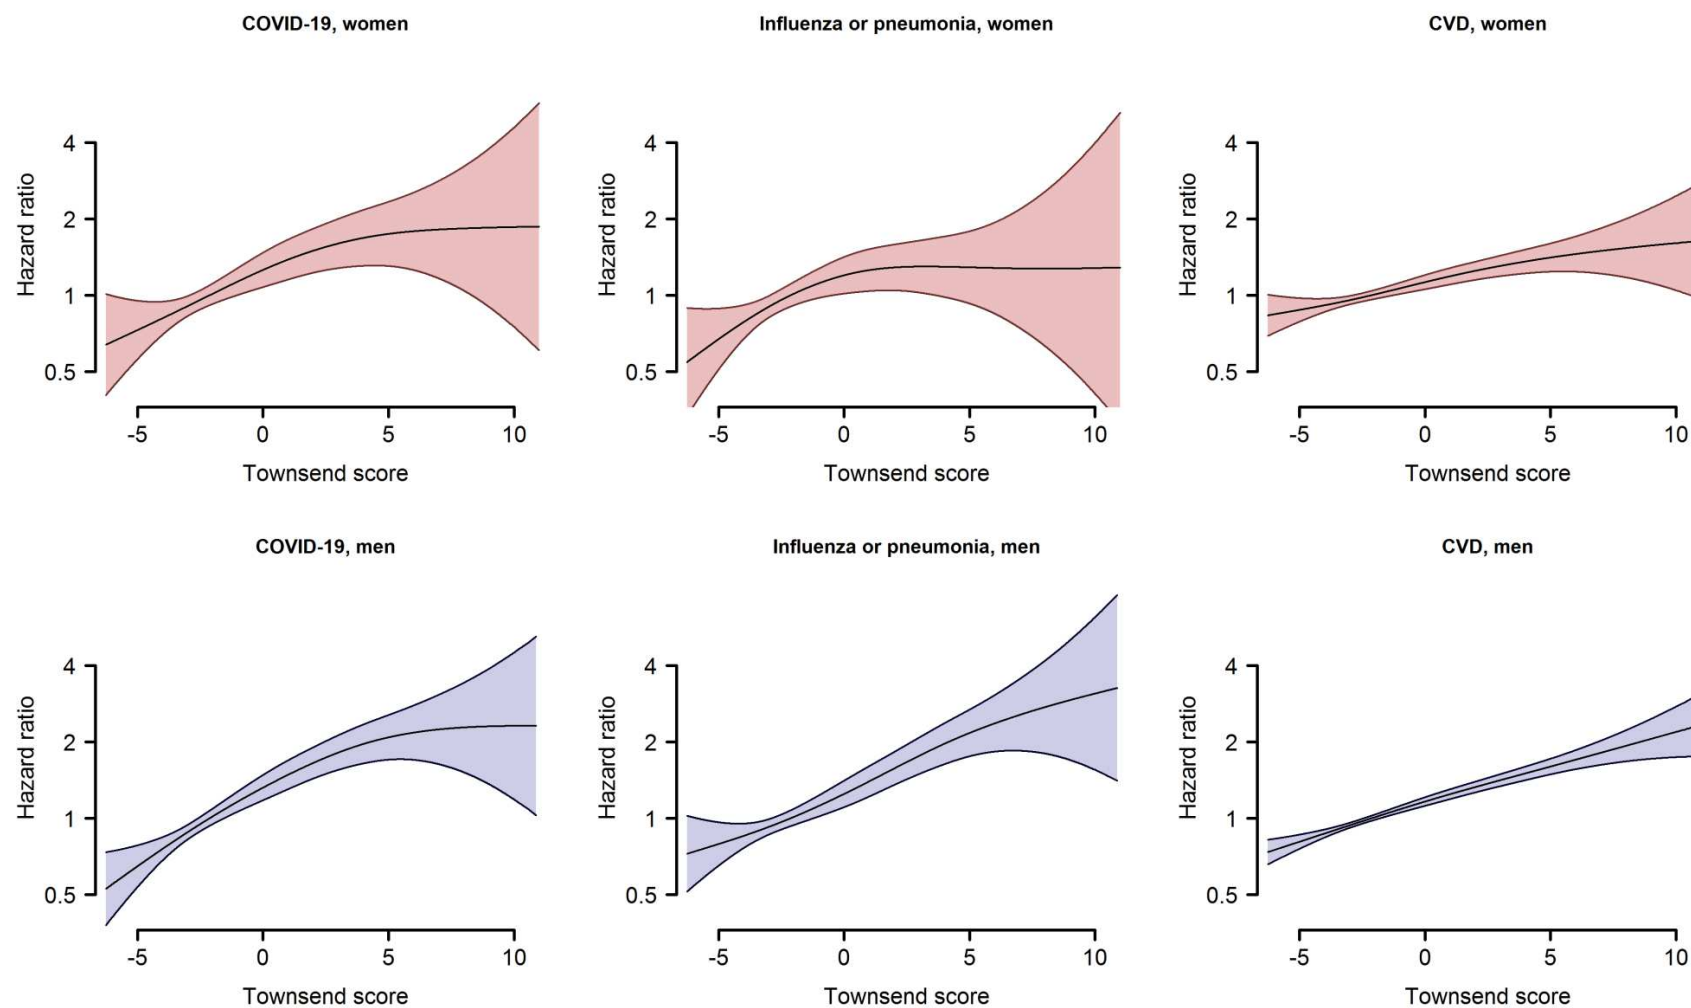

<sup>1</sup> Adjusted for age, ethnicity, systolic blood pressure, diabetes, smoking, BMI, total cholesterol, and previous CVD.

**Supplementary figure 2: Penalised spline plots of age and ethnicity adjusted hazard ratios (with shaded 95% confidence intervals) for the association between Townsend score and death from COVID-19, by body mass index group. Red lines, and confidence intervals, for women; blue for men.**

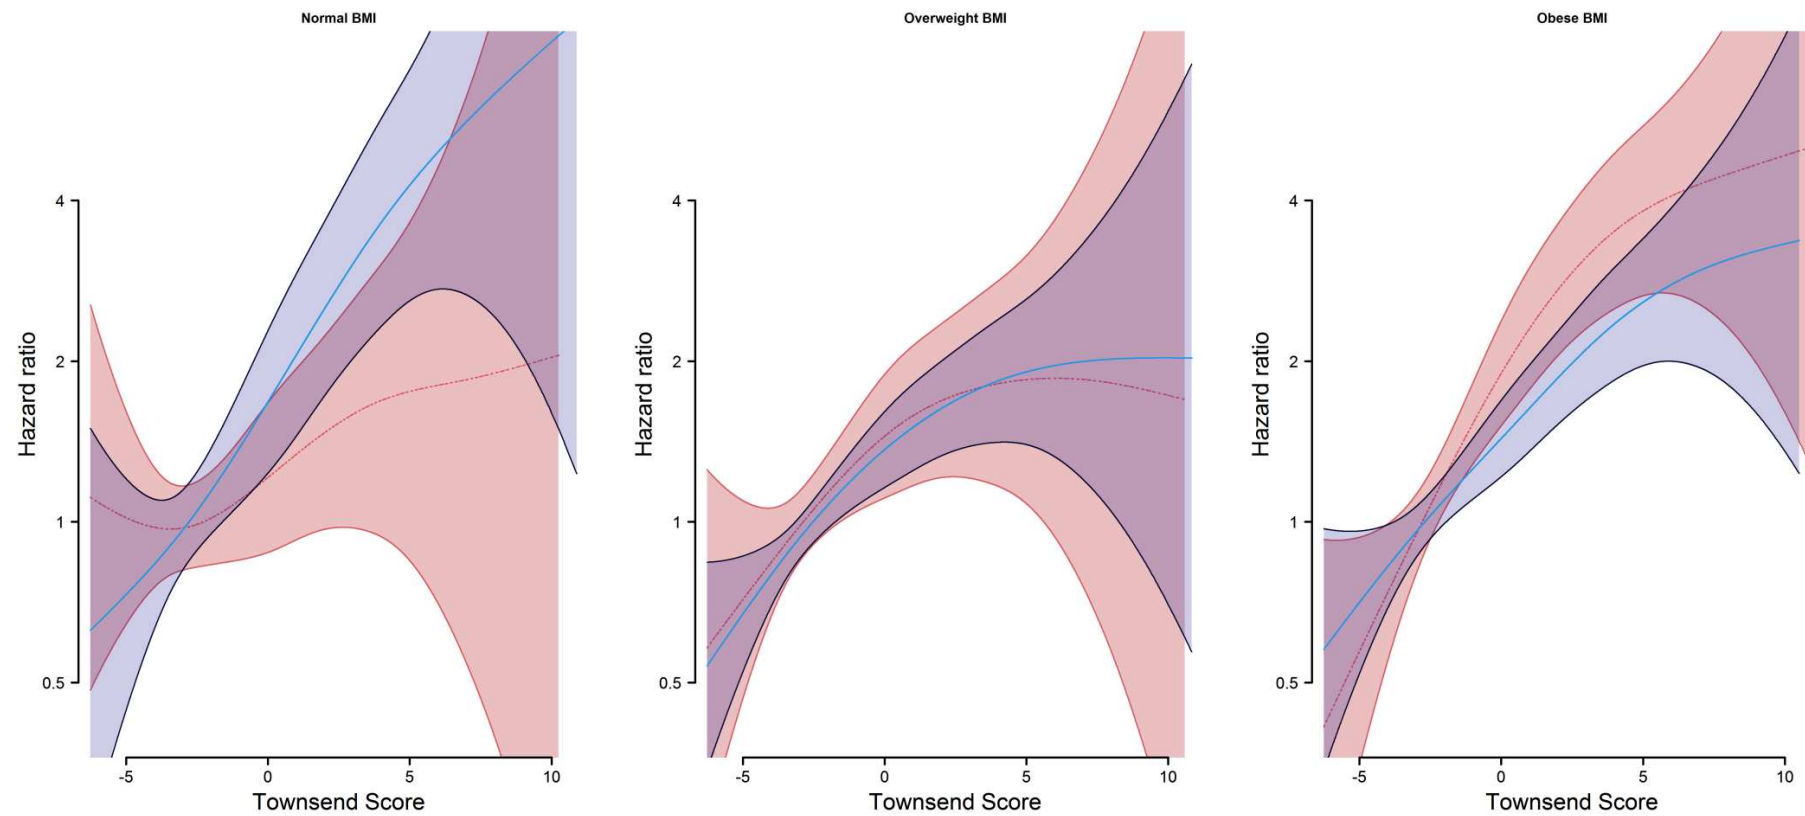



**Supplementary figure 3: Age and ethnicity adjusted hazard ratios (HRs, with 95% confidence intervals (CIs)), and women-to-men ratio of HRs (RHRs, with 95% CIs), for the association between one unit higher Townsend score and death from influenza or pneumonia by sex and subgroup**

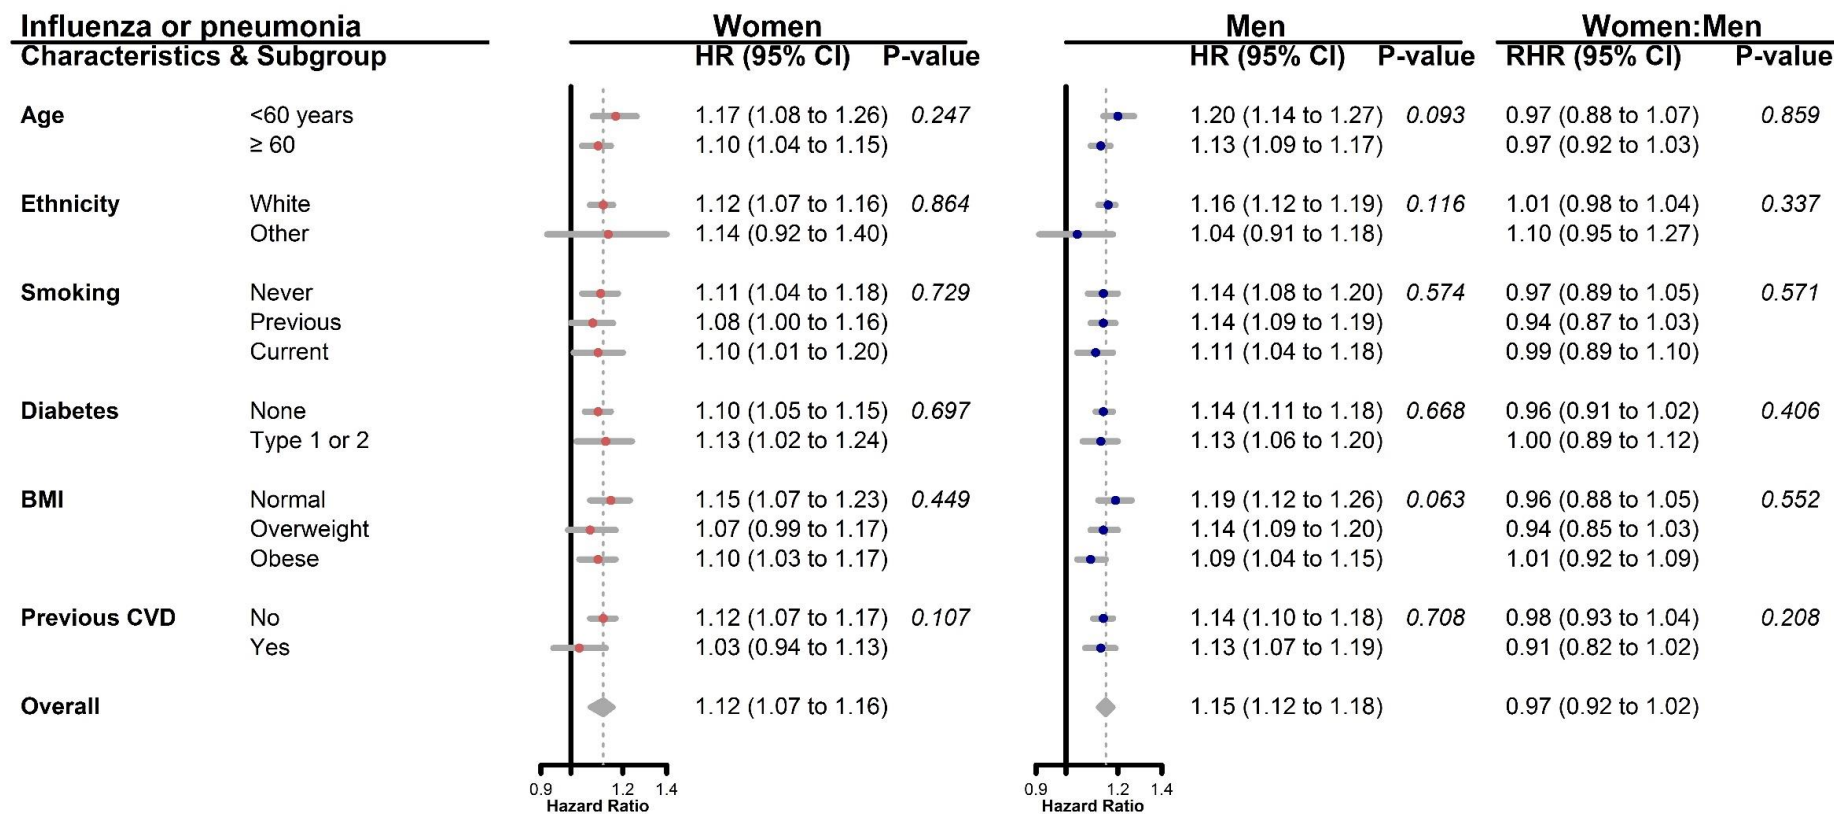

Supplementary figure 4: Age and ethnicity adjusted hazard ratios (HRs, with 95% confidence intervals (CIs)), and women-to-men ratio of HRs (RHRs, with 95% CIs), for the association between one unit higher Townsend score and death from cardiovascular disease (CVD) by sex and subgroup

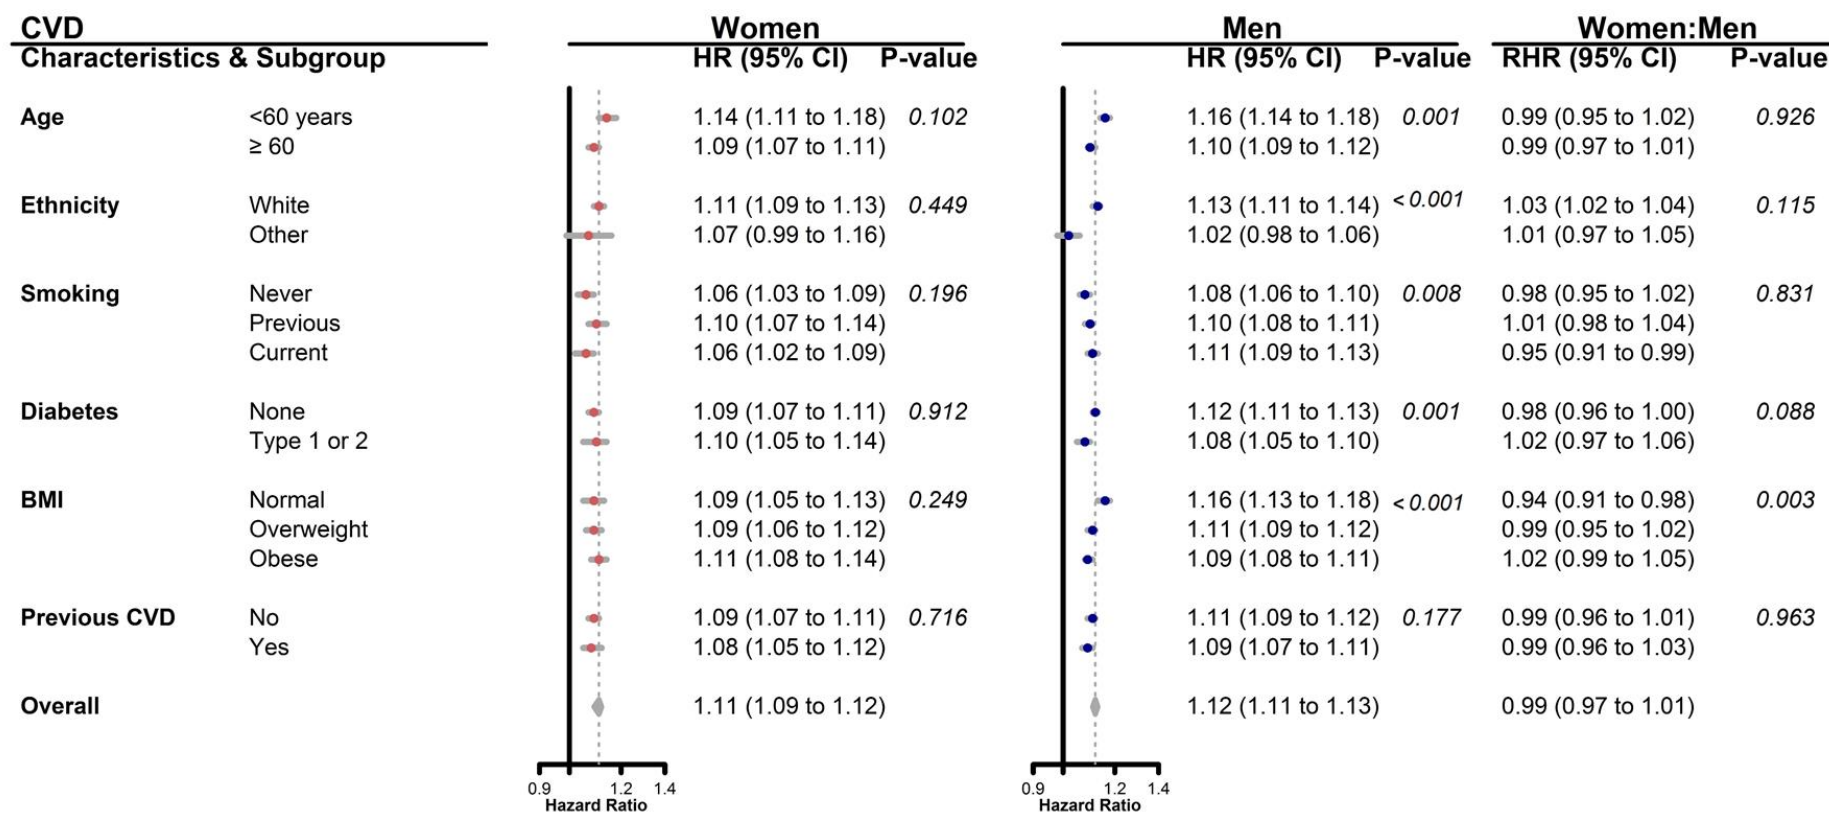

## Supplementary methods – description of variable creation

**Age** – Provided by UK Biobank (Age when attended assessment centre).

**Ethnicity** – Participants were asked “what is your ethnic group?” during the initial Assessment Centre visit as part of the touchscreen questionnaire. At the top level the options were (White, Mixed, Asian or Asian British, Black or Black British, Chinese, Other Ethnic Group, Do not know, prefer not to answer) an amalgam of sequential branching questions then garnered more details (i.e. if the participant answered White they were then asked (British, Irish, any other white background, prefer not to answer). The authors coded the following as White (British, Irish, any other white background, White) and the remaining options as other.

**Townsend** – Provided by UK Biobank (Townsend deprivation index calculated immediately prior to participant joining UK Biobank. Based on the preceding national census output areas. Each participant is assigned a score corresponding to the output area in which their postcode is located)

*Fifths* - Townsend Deprivation Score was then grouped into equal fifths by the authors (using the resource <https://www.statistics.digitalresources.jisc.ac.uk/dataset/2011-uk-townsend-deprivation-scores>), such that the lowest fifth contained the 20% least socially deprived (least disadvantaged), and the highest fifth contained the 20% most deprived (most disadvantaged)

**SBP** – Systolic Blood pressure provided by UK Biobank

- 1) (Blood pressure, automated reading, systolic. Two measures of blood pressure were taken a few moments apart. Range returned by the Omron device is 0-255)
- 2) (Blood pressure, manual reading, systolic. Two measures of blood pressure were taken a few moments apart. A manual sphygmometer was used if the standard automated device could not be employed).

The authors calculated the mean of the two baseline measures to represent baseline SBP.

**Diabetes** – Participants answered a question “Has a doctor ever told you that you have diabetes?”, if the answer was affirmative, they were then asked “What was your age when the diabetes was first diagnosed? The authors derived type 1 and type 2 diabetes. If the stated age at diagnosis was less than 30 and insulin use was reported, the participant was classified as having type 1 diabetes; otherwise as type 2 diabetes.

**Smoking** – Derived by UK Biobank as Current, Previous, Never, prefer not to answer (using variables “Current tobacco smoking” and “Past tobacco smoking”)

**BMI** – Provided by the UK Biobank (BMI value here is constructed from height and weight measured during the initial Assessment Centre visit. Value is not present if either of these readings were omitted)

**Total cholesterol** – Provided by the UK Biobank. Measured by CHO-POD analysis on a Beckman Coulter AU5800. Cholesterol was available from a range of key biochemistry markers that were measured in the blood sample collected at recruitment (for all 500,000 participants).

**Previous CVD** - Medical history of CVD was self-reported, based on a question asking the participant whether they had vascular/heart problems diagnosed by a doctor. The authors coded up a positive answer of MI, Stroke or Angina to indicate previous CVD.
